17 **Abstract**

18 Gram-negative bacteria in the order Rickettsiales are obligate intracellular  
19 parasites that cause human diseases such typhus and spotted fever. They have  
20 evolved a dependence on essential nutrients and metabolites from the host cell as a  
21 consequence of extensive genome streamlining. However, it remains largely unknown  
22 which nutrients they require and whether their metabolic dependency can be exploited  
23 therapeutically. Here, we describe a genetic rewiring of bacterial isoprenoid biosynthetic  
24 pathways in the Rickettsiales that has resulted from reductive genome evolution. We  
25 further investigated whether the spotted fever group *Rickettsia* species *Rickettsia*  
26 *parkeri* scavenges isoprenoid precursors directly from the host. Using targeted mass  
27 spectrometry in uninfected and infected cells, we found decreases in host isoprenoid  
28 products and concomitant increases in bacterial isoprenoid metabolites. Additionally, we  
29 report that bacterial growth is prohibited by inhibition of the host isoprenoid pathway  
30 with the statins class of drugs. We show that growth inhibition correlates with changes  
31 in bacterial size and shape that mimic those caused by antibiotics that inhibit  
32 peptidoglycan biosynthesis, suggesting statins inhibit cell wall synthesis. Altogether, our  
33 results describe an Achilles' heel of obligate intracellular pathogens that can be  
34 exploited with host-targeted therapeutics that interfere with metabolic pathways required  
35 for bacterial growth.

36

37

38

39 **Importance**

40           Obligate intracellular parasites, which include viruses as well as certain bacteria  
41 and eukaryotes, extract essential nutrients and metabolites from their host cell. As a  
42 result, these pathogens have often lost essential biosynthetic pathways and are  
43 metabolically dependent on the host. In this study, we describe a metabolic dependency  
44 of the bacterial pathogen *Rickettsia parkeri* on host isoprenoid molecules that are used  
45 in the biosynthesis of downstream products including cholesterol, steroid hormones,  
46 and heme. Bacteria make products from isoprenoids such as an essential lipid carrier  
47 for making the bacterial cell wall. We show that bacterial metabolic dependency can  
48 represent an Achilles' heel, and that inhibiting host isoprenoid biosynthesis with the  
49 FDA-approved statin class of drugs inhibits bacterial growth by interfering with the  
50 integrity of the cell wall. This work highlights a potential to treat infections by obligate  
51 intracellular pathogens through inhibition of host biosynthetic pathways that are  
52 susceptible to parasitism.

53

54

## 55 **Introduction**

56 Gram-negative alphaproteobacteria in the family Rickettsiaceae, which includes  
57 the genera *Rickettsia* and *Orientia*, are obligate intracellular parasites that can cause  
58 human diseases including spotted fever (spotted fever group (SFG) *Rickettsia*), typhus  
59 (typhus group (TG) *Rickettsia*), and scrub typhus (*Orientia* species) (1). These bacteria  
60 are transmitted to mammals by arthropod vectors such as fleas, ticks, and mites.  
61 Although most pathogenic species cause moderately severe illnesses, in some cases  
62 infections can be fatal if untreated or even upon delayed treatment with first-line  
63 antibiotics (2). We study the SFG species *R. parkeri*, which causes an eschar at the site  
64 of the tick bite and symptoms that include fever, malaise, nausea, headaches, and an  
65 occasional rash (3, 4).

66 Upon invasion of host cells, the Rickettsiaceae quickly escape the primary  
67 vacuole into the host cell cytoplasm, where they grow and proliferate. One property of  
68 obligate intracellular bacteria such as *Rickettsia* is that adaptation to a dependency  
69 upon growth inside host cells has resulted in genome size reduction (5-9). The relatively  
70 small genomes of *Rickettsia* species (~1.1-1.5 Mbp) encode for a reduced number of  
71 proteins (1273 predicted proteins in *Rickettsia parkeri*; NCBI reference sequence:  
72 NC\_017044.1). This typically correlates with the loss of genes encoding components of  
73 metabolic biosynthetic pathways, together with the requirement to scavenge essential  
74 metabolites from the host (5, 8).

75 One essential class of metabolites are the isoprenoids (also known as  
76 terpenoids), which are derived from simple five carbon isoprene units that are  
77 assembled to make thousands of different molecules. The biosynthesis of the central

78 isoprene precursor molecule, isopentenyl pyrophosphate (IPP), and its isomer,  
79 dimethylallyl diphosphate (DMAPP), occurs through two distinct pathways. The  
80 mevalonate (MEV) pathway (predominantly in archaea, Gram-positive bacteria, and  
81 animals) or the 2-C-methyl-D-erythritol 4-phosphate (MEP) pathway (primarily in Gram-  
82 negative bacteria) (Figure 1). In bacteria, isoprenoid biosynthesis produces vital  
83 products such as bactoprenols (essential building blocks for peptidoglycan (PG) and  
84 other cell wall polysaccharides), ubiquinone or menaquinone (involved in the electron  
85 transport chain), or chlorophylls in cyanobacteria (10). In mammalian cells, isoprenoid  
86 biosynthesis produces a larger variety of products including cholesterol, ubiquinone,  
87 steroid hormones, prenylated proteins, heme, and vitamin K (11).

88         Although the isoprenoid biosynthetic pathway is essential, its components are  
89 missing from certain obligate pathogens including *Mycoplasma* species (12) and the  
90 protozoan parasite *Cryptosporidium* (13). Bioinformatic analysis (14) shows that genes  
91 encoding the upstream enzymes from the MEV and MEP pathways that are required to  
92 make IPP and DMAPP are also missing in *Rickettsia* species, with the exception of the  
93 *idi* gene encoding the enzyme isopentenyl diphosphate isomerase (IDI), which  
94 catalyzes the reversible conversion of IPP to DMAPP (15). Since *Rickettsia* have  
95 access to metabolites in the host cytoplasm, this suggests that *Rickettsia* may steal IPP  
96 and/or DMAPP, altering the flux of host-derived isoprenoid precursors to initiate  
97 downstream bacterial isoprenoid biogenesis. The downstream enzymes required to  
98 utilize these short-chained isoprenoid precursors for ubiquinone biosynthesis and PG  
99 biosynthesis are encoded in *Rickettsia* genomes.

100 In this study, we explore the evolutionary changes that occurred within the order  
101 *Rickettsiales* with respect to the presence of genes encoding components of the  
102 isoprenoid biosynthetic pathway. We also show that bacterial infection results in  
103 depletion of host isoprenoid products and the synthesis of bacterial isoprenoid products.  
104 Furthermore, we use a chemical genetic approach to reveal that inhibition of host  
105 isoprenoid biosynthesis by statin treatment prevents bacterial growth and alters  
106 bacterial shape. Our results suggest that the host MEV pathway serves as the upstream  
107 source of isoprene units for the synthesis of bacterial bactoprenols and ubiquinone, and  
108 that inhibition of the host MEV pathway by statins may represent a promising avenue for  
109 host-directed therapeutics to treat *Rickettsia* infection.

110

## 111 **Results**

### 112 **The isoprenoid biosynthesis pathway is under evolutionary flux in the order**

#### 113 ***Rickettsiales***

114 We first sought to determine the evolutionary conservation of the isoprenoid  
115 biosynthesis pathway in the order *Rickettsiales*. We constructed a phylogenetic tree  
116 using 16S rDNA sequences across six main genera of the order as well as the closest  
117 free-living organism, *Pelagibacter ubique*, and assessed the presence or absence of  
118 genes encoding upstream or downstream components of the MEP pathway as well as  
119 the IDI enzyme (Figure 2A). We confirmed that the *Rickettsia* (14) and *Orientia* lineages  
120 lack the genes encoding upstream MEP pathway enzymes but have those encoding the  
121 downstream pathway components, whereas the other genera contained the full  
122 complement of MEP pathway genes. None have MEV pathway genes, with the

123 exception of the *idi* gene in *Rickettsia* species. The absence of upstream MEP pathway  
124 genes suggests that *Rickettsia* must scavenge MEV/MEP pathway intermediates (IPP,  
125 DMAPP or FPP, Figure 1) from the host cell.

126         Additionally, the *idi* gene is only present in the *Rickettsia* lineage but not the  
127 *Orientia* lineage. A previous report suggested that the *idi* gene in *Rickettsia* was  
128 acquired by horizontal gene transfer (14). To further investigate this, we examined the  
129 genomic locus surrounding the *idi* gene in the *R. parkeri* str. Portsmouth genome  
130 (Figure 2B). We found many surrounding genes that were associated with conjugal  
131 transfer functions, such as transposases and pili. Furthermore, there are nine  
132 surrounding pseudogenes with premature stop codons, suggesting this region is in flux  
133 and may be in the process of undergoing genomic reduction. To further test this  
134 hypothesis, we performed a whole genome alignment between *R. parkeri* and the  
135 closely related yet more pathogenic species *R. rickettsii*. Interestingly, we found the two  
136 genomes were highly syntenic, with the exception of a 65kb region containing the *idi*  
137 gene (Figure 2C, region in lime green, *idi* gene in purple) that is inverted between the  
138 two species and in the *R. rickettsii* genome contains a 33.5 kb deletion (orange  
139 highlighted region in Figure 2C and Supplemental Table S1). These observations  
140 suggest that the locus surrounding the *idi* gene was acquired by horizontal gene  
141 transfer and is still under evolutionary pressure to retain the *idi* gene while  
142 simultaneously undergoing continuing reduction.

143

144 ***R. parkeri* infection results in depletion of host isoprenoid products and**  
145 **accumulation of bacterial isoprenoid products**

146 To test whether *R. parkeri* scavenges host isoprenoids to make bacterial  
147 products, we measured the presence and abundance of host and bacterial isoprenoid-  
148 derived metabolites by liquid chromatography-mass spectrometry (LC-MS/MS).  
149 Confluent infected and mock-infected cultures of African green monkey kidney epithelial  
150 Vero cell cultures were incubated for 4 d, collected and then extracted for lipid  
151 metabolites. For host isoprenoids, we monitored cholesterol, total cholesteryl esters,  
152 cholesteryl oleate, and ubiquinone-10 using single-reaction monitoring (SRM)-based  
153 LC-MS/MS methods (Figure 3). We observed a statistically significant approximately 2-  
154 fold decrease in total cholesteryl esters and cholesteryl oleate in the infected compared  
155 with uninfected samples. These products are generally understood to be the storage  
156 units of cholesterol packaged in intracellular lipid droplets (16). In contrast, we saw no  
157 change in cholesterol or ubiquinone-10. Thus, infection results in the depletion of  
158 isoprenoid-derived storage forms of cholesterol.

159 For bacterial isoprenoids, we measured bactoprenols, which include the  
160 isoprenoid products C<sub>55</sub>-isopentyl pyrophosphate (C<sub>55</sub>-IPP) and C<sub>55</sub>-isopentyl phosphate  
161 (C<sub>55</sub>-IP). C<sub>55</sub>-IPP is initially produced by a dedicated prenyltransferase, UppS, and must  
162 be dephosphorylated to C<sub>55</sub>-IP to act as a lipid carrier (17). We also measured bacterial  
163 ubiquinone, ubiquinone-8, which contains an 8 prenyl subunit tail, in contrast with the  
164 human version containing 10 prenyl subunits, ubiquinone-10 (Figure 3) (18, 19). We  
165 observed a statistically-significant approximately 4-fold increase in both C<sub>55</sub>-IPP and  
166 C<sub>55</sub>-IP in infected compared with uninfected cells. We did not, however, find significant  
167 differences in bacterial ubiquinone (ubiquinone-8), possibly due to the presence of  
168 ubiquinone-8 intermediates from the host cell ubiquinone-10 biosynthesis pathway.



169 These results indicate that bacterial isoprenoid products, primarily bactoprenols,  
170 accumulate during *R. parkeri* infection. Collectively, the depletion of host isoprenoid  
171 products and accumulation of bacterial isoprenoid products, even in the absence of a  
172 bacterial isoprenoid synthesis pathway, suggests that isoprenoids are scavenged from  
173 the host by *R. parkeri*.

174

### 175 **Chemical inhibition of the host mevalonate pathway inhibits bacterial growth**

176 To determine whether host isoprenoids are necessary for bacterial growth, we  
177 sought to inhibit the host mevalonate pathway and reduce the pool of available host IPP  
178 and DMAPP. We used statins, a class of drugs that block the activity of HMG-CoA  
179 reductase (Figure 1). A previous report showed that pre-incubation of *R. conorii* infected  
180 mouse L929 fibroblast cells with the statin lovastatin caused a reduction in *R. conorii*  
181 plaque size, which was interpreted to result from a reduction in cholesterol-dependent  
182 adherence of bacteria to host cells (20). To bypass possible effects of statins on  
183 bacterial adherence and invasion, we allowed infection of Vero cells to proceed for 2 h  
184 to allow for maximal bacterial adherence/invasion (21), treated cells with (or without)  
185 various concentrations of the statin pitavastatin, and then measured bacterial numbers  
186 using a *R. parkeri*-specific qPCR endpoint assay (Figure 4A). We observed a >2-log  
187 reduction in bacterial growth with increasing pitavastatin concentrations. To ensure that  
188 statin inhibition of bacterial growth was dependent on HMG-CoA reductase inhibition by  
189 pitavastatin and not secondary effects of the drug, we tested whether the downstream  
190 product of HMG-CoA reductase, mevalonate, could rescue this growth inhibition.

191 Indeed, co-treated with 400  $\mu$ M mevalonate along with pitavastatin rescued bacterial  
192 growth (Figure 4A).

193 To further assess the importance of the MEV pathway, we generated dose-  
194 response curves for the effect of lovastatin and pitavastatin, which are chemically  
195 distinct, on *R. parkeri* growth using a 96-well qPCR endpoint assay. We observed a  
196 dose-dependent inhibition of bacterial growth with lovastatin ( $EC_{50} = 2.0 \mu$ M) and even  
197 more robust inhibition with pitavastatin ( $EC_{50} = 0.5 \mu$ M) (Figure 4B). This data indicates  
198 that the host MEV pathway is critical for *R. parkeri* growth.

199 To further test that bacterial growth is dependent on a complex integration of the  
200 host and pathogen isoprenoid pathways (as depicted in Figure 1), we tested for dose-  
201 dependent growth inhibition using additional inhibitors of MEV and MEP pathway  
202 enzymes (Figure 4B). Fosmidomycin, which specifically inhibits 1-deoxy-D-xylulose 5-  
203 phosphate (DXP) reductoisomerase, a key enzyme in the bacterial MEP pathway,  
204 caused no inhibition of bacterial growth at up to 100  $\mu$ M. Alendronate sodium, a specific  
205 inhibitor of host farnesyl diphosphate (FPP) synthase, caused approximately 50%  
206 growth inhibition. This further suggests that *R. parkeri* growth is independent of bacterial  
207 isoprenoid production, and partially dependent on FPP from the host.

208 Finally, we tested the anti-bacterial antibiotics tetracycline, which is used as a  
209 first-line treatment for *Rickettsia* infection and targets protein synthesis, or D-  
210 cycloserine, which blocks the PG biosynthesis pathway that also requires isoprenoid  
211 biosynthesis products. Tetracycline inhibited growth with an  $EC_{50} = 0.7 \mu$ M, consistent  
212 with minimal inhibitory concentrations (MIC) values for SGF rickettsiae of 0.06-0.25  
213  $\mu$ g/mL (0.1-0.5  $\mu$ M) (22). D-cycloserine also caused a dose-dependent inhibition of *R.*

214 *parkeri* growth with an EC<sub>50</sub> = 56 μM, consistent with effects on *R. prowazekii* (23), and  
215 with minimal inhibitory concentrations (MIC) values for *Escherichia coli* K12 (MIC = 30  
216 μg/mL, 290 μM) (24) and *Mycobacterium tuberculosis* (15 μg/mL, 150 μM) (25). Taken  
217 together, the results of chemical inhibition assays support the notion that *Rickettsia* are  
218 dependent on the upstream host MEV pathway, but not the upstream MEP pathway.  
219 Furthermore, they are susceptible to inhibition of PG biosynthesis.

220

### 221 **Statins treatment causes bacterial shape defects that mimic those caused by** 222 **peptidoglycan-targeting antibiotics**

223 We sought to further assess the effect of statin treatments on bacterial  
224 physiology. Limiting the availability of isoprenoids is predicted to result in reduced PG  
225 due to the requirement for isoprenoids in PG synthesis. Though *Rickettsia* (22)1, like  
226 other Gram-negative bacteria (26), are generally resistant to PG targeted antibiotics,  
227 one study showed that high concentrations of penicillin produced spheroplasts (27), a  
228 type of L-form bacteria that have a defective PG cell wall and take on a spherical shape  
229 (28). Therefore, we sought to measure whether statin inhibition of the host MEV  
230 pathway altered bacterial shape in a similar manner to inhibition of PG synthesis. To  
231 this end, we performed immunofluorescence microscopy on 96-well plates of infected  
232 cells at 3 dpi to track the alterations of bacterial shape in response to dose-dependent  
233 application of statins, D-cycloserine, or tetracycline as a control. We performed  
234 automated image analysis using CellProfiler (29) and measured a number of bacterial  
235 cell shape features. We determined that two shape measurements, area and  
236 eccentricity (circle = 0, rod/line = 1), accounted for most of the shape alterations seen in

237 the concentration ranges between EC<sub>50</sub>-EC<sub>100</sub>. In D-cycloserine treated cells, there was  
238 a dose-dependent increase in area and decrease in eccentricity as bacteria became  
239 more circular and less rod-shaped (Figure 5A, B). In cells treated with either lovastatin  
240 or pitavastatin, similar changes in area and eccentricity were seen along the dose-  
241 response curve. In contrast, upon treatment with tetracycline, we found little change in  
242 the bacterial area, although there was a general decrease in eccentricity.

243       Upon comparison of shapes at the EC<sub>100</sub> of each drug compared to the no-drug-  
244 treated control, we observed a significant increase in bacterial area and significant  
245 decrease in eccentricity in cells treated with D-cycloserine, lovastatin and pitavastatin  
246 (Figure 5C). For tetracycline, we found no significant differences in area or eccentricity  
247 compared to the untreated control group, likely because tetracycline does not directly  
248 interfere with cell wall biosynthesis. Thus, growth inhibition by statins causes bacterial  
249 shape defects that are similar to those caused by D-cycloserine, suggesting a shared  
250 mechanisms of bacterial growth inhibition resulting from targeting host isoprenoid and  
251 bacterial PG synthesis pathways.

252

## 253 **Discussion**

254       Obligate intracellular pathogens such as *Rickettsia* are dependent upon nutrients  
255 and metabolites from their host cells as a consequence of reductive genome evolution  
256 (5, 6, 14). This suggests the possibility that this metabolic dependency represents an  
257 Achilles' heel in the host-pathogen relationship, and that these pathogens could be  
258 sensitive to changes in host cell nutrient and metabolite levels. If metabolite availability  
259 is limited by the host or by extrinsic pressures such as chemical inhibition of a host

260 biosynthetic pathway, pathogen growth should also be reduced. Here, we report the  
261 reduction of *R. parkeri* replication when the host isoprenoid pathway is inhibited with  
262 statins. This growth inhibition correlates with changes in bacterial shape that are  
263 consistent with defects in cell wall biosynthesis. Our results suggest that statins interfere  
264 with *Rickettsia* scavenging of host isoprenoids used for bacterial cell wall biosynthesis.

265 We observe that the isoprenoid biosynthesis pathway is under evolutionary flux  
266 in the order Rickettsiales, with the *Rickettsia* and *Orientia* lineages having lost genes  
267 encoding the upstream components of the MEP pathway, and *Rickettsia* having gained  
268 the *idi* gene. This is consistent with previous findings (14). Through our understanding  
269 of reductive genome evolution and gene acquisition in prokaryotes (5, 6, 8, 30), we can  
270 surmise a most parsimonious order of loss and gain of isoprenoid biosynthetic pathway  
271 genes in the Rickettsiales. We propose that the common ancestor of the *Rickettsia* and  
272 *Orientia* lineages, which inhabit the host cell cytoplasm, may have gained the ability to  
273 scavenge IPP and/or DMAPP from the cytoplasm by acquisition of a gene encoding  
274 a transporter that moves these highly charged pyrophosphate molecules into the bacterial  
275 cell. There is evidence for the presence of such transporters in plants, bacteria, and  
276 protozoan parasites, although their molecular identities remain uncertain (31-33). The  
277 gain of a transporter would have enabled the loss of the upstream MEP pathway genes  
278 to streamline the bacterial genome and reduce fitness costs of pathway redundancy.  
279 Subsequently, the *idi* gene was gained in the *Rickettsia* lineage, which may reflect a  
280 need for additional DMAPP beyond that acquired from the host MEV pathway. In  
281 contrast, *Ehrlichia*, *Anaplasma*, *Wolbachia*, and *Neorickettsia* lineages, which grow

282 within a membrane-bound vacuole, may not have sufficient access to host IPP and/or  
283 DMAPP and therefore have retained the entire MEP pathway.

284 We also found evidence of metabolic parasitism of host isoprenoids by *R.*  
285 *parkeri*. In particular, infected host cells become depleted of isoprenoid-derived storage  
286 forms of cholesterol, total cholesteryl esters and cholesteryl oleate, perhaps to balance  
287 free cholesterol levels. Whether *Rickettsia* also scavenge downstream host isoprenoid  
288 products such as cholesterol, as observed for other bacteria such as *M. tuberculosis*  
289 and *Chlamydia trachomatis* (34-36), remains to be determined. Furthermore, *R. parkeri*  
290 produces downstream isoprenoid products even though it lacks genes for the upstream  
291 components of the MEP pathway. This metabolic parasitism suggests that inhibition of  
292 host isoprenoid biosynthesis should reduce the ability of the bacteria to synthesize  
293 bacterial isoprenoid products.

294 In keeping with this prediction, we found that statins, which inhibit host HMG-  
295 CoA-reductase, halt *R. parkeri* growth. Previous work had established an ability of  
296 statins to limit rickettsial plaque size (20), but mechanism of inhibition was not explored  
297 in detail. It was suggested that statins might inhibit *Rickettsia* adherence to and/or  
298 invasion of host cells based on previous studies that had found a role for cholesterol  
299 these processes (37, 38). Our work, however, reveals an effect of statins on intracellular  
300 bacterial growth, downstream of adherence/invasion. Furthermore, with increasing  
301 statin concentration, we find morphological changes in the shape and size of bacteria  
302 that mirror those caused by the cell wall synthesis inhibitor D-cycloserine. These  
303 observations lead us to conclude that statins inhibit bacterial growth by reducing host

304 metabolite availability for production of bacterial products required for PG biosynthesis,  
305 leading to lethal defects in the bacterial cell wall.

306       Whether statins can be effective at preventing or treating human *Rickettsia*  
307 infections remains to be determined. Although statins are well tolerated in humans, and  
308 both statins tested in this study are FDA-approved, we have limited understanding of  
309 the dose response curves for inhibition of bacterial growth versus host toxicities that can  
310 include myopathy and increased risk of diabetes and stroke (39). Furthermore, it is  
311 unclear if statins have the same degree of bacterial growth inhibition in different  
312 rickettsial target cell types in vivo. Additional studies in animal models will shed light on  
313 future promise of statins as a prophylaxis or treatment for rickettsial infections.  
314 Currently, cases of rickettsial diseases are effectively treated with tetracyclines,  
315 although there are reported cases of tetracycline-resistant scrub typhus (40, 41), and  
316 tetracycline treatment is contraindicated for pregnant women and young children (42).  
317 Because a limited number of antibiotics are effective in treating rickettsial infections  
318 (22), host-targeted therapeutics would be useful additions to treatment regimens.  
319 Furthermore, targeting host biosynthesis of essential metabolites may limit the  
320 development of antibiotic resistance.

321       Beyond the scope of rickettsial infections, this study points to a potential to use  
322 host-targeted therapeutics for a wide variety of infectious microbes, including viruses,  
323 bacteria, fungi, and parasites. Similar to *R. parkeri*, the parasite *Cryptosporidium*  
324 *parvum* lacks the canonical protozoan isoprenoid pathway and has been shown to be  
325 sensitive to statins (43). In the future, bioinformatic analyses may identify other  
326 intracellular bacteria that have incomplete upstream isoprenoid pathways and intact

327 downstream isoprenoid pathways, and thus may also be sensitive to statins.  
328 Furthermore, *Rickettsia* and other parasites may be sensitive to chemical inhibition of  
329 other host metabolic pathways. Layering our knowledge of FDA-approved compounds  
330 that target host biosynthetic pathways onto predicted metabolic pathways hijacked by  
331 pathogens may therefore enable the systematic identification of drug classes that could  
332 be re-purposed as antibiotics.

333

## 334 **Materials and Methods**

### 335 ***Reagents***

336 Hoechst 33342 (B2261), D-cycloserine (C6880), tetracycline (T7660), fosmidomycin  
337 (F8682), mevalonate (M4667), and alendronate sodium hydrate (A4978) were obtained  
338 from Sigma-Aldrich. ProLong Gold Antifade (P36930), Pitavastatin (494210), Lovastatin  
339 InSolution (4381875), goat anti-mouse Alexa-488 secondary antibody (R37120), 0.25%  
340 Trypsin-EDTA phenol red (25200056) and Dynamo HS SYBR Green qPCR kit (F-410L)  
341 were obtained from Thermo-Fisher Scientific. Anti-*Rickettsia* 14-13 antibody was  
342 generously provided by Ted Hackstadt, NIH/NIAID Rocky Mountain Laboratories (44).

343

### 344 ***Cell culture and R. parkeri infections***

345 Confluent low-passage African green monkey epithelial Vero cells were obtained from  
346 the UC Berkeley Cell Culture Facility and grown at 37°C, 5% CO<sub>2</sub>, in high glucose (4.5  
347 g/l) DMEM (Gibco, Life Technologies, 11965092) supplemented with 2% fetal bovine  
348 serum (FBS, Benchmark). *R. parkeri* strain Portsmouth was generously provided by  
349 Chris Paddock (Centers for Disease Control and Prevention). *R. parkeri* was



350 propagated by infecting monolayers of Vero cells with an MOI = 0.1 of wild-type *R.*  
351 *parkeri* and growing them at 33°C, 5% CO<sub>2</sub> in DMEM plus 2% FBS. Bacteria were  
352 purified from infected cells as described previously (45). Briefly, infected cells were  
353 lysed by dounce homogenization in cold K-36 buffer (0.05 M KH<sub>2</sub>PO<sub>4</sub>, 0.05 M K<sub>2</sub>HPO<sub>4</sub>,  
354 pH 7, 100 mM KCl, 15 mM NaCl) to release bacteria, the lysate was overlaid onto 30%  
355 MD-76R (Mallinckrodt Inc., 1317-07), centrifuged at 58,300 x g for 20 min at 4°C in a  
356 SW-28 swinging bucket rotor, and resuspended in cold brain heart infusion (BHI) media  
357 (BD Difco, 237500) broth. Aliquots of bacteria were immediately frozen at -80°C after  
358 purification and each infection was initiated from a single thawed aliquot of bacteria.  
359

### 360 ***Phylogenetic analyses, idi locus mapping, and whole genome alignments***

361 Phylogenetic relationships between bacterial species were analyzed using 16S rDNA  
362 sequences downloaded from the SILVA database (<https://www.arb-silva.de/>).  
363 Phylogenetic trees were built with the Tree Builder program on Geneious software  
364 version 9.1.8 using the neighbor-joining method with *Pelagibacter ubique* as the  
365 outgroup. The presence/absence of the MEP pathway or *idi* gene was determined using  
366 the KEGG pathway database (<http://www.kegg.jp/>) and manual annotations of the  
367 terpenoid backbone biosynthesis pathway ([http://www.kegg.jp/kegg-](http://www.kegg.jp/kegg-bin/show_pathway?map=map00900)  
368 [bin/show\\_pathway?map=map00900](http://www.kegg.jp/kegg-bin/show_pathway?map=map00900)) for each bacterial species. Determination of  
369 intracellular niche was performed by manual literature curation. *Idi* locus map and  
370 annotations were examined using Geneious software version 9.1.8 using the *R. parkeri*  
371 str. Portsmouth genome sequence (NCBI RefSeq: NC\_017044.1). Whole genome  
372 alignments of *R. parkeri* str. Portsmouth and *R. rickettsii* str. Iowa (NCBI RefSeq:

373 NC\_010263.3) were performed using the Mauve 2.3.1 (46) plugin in Geneious software  
374 using the progressive Mauve algorithm with automatically-calculated-minimum locally  
375 collinear block (LCBs) scores.

376

### 377 **Mass spectrometry**

378 Monolayers of Vero cells plated in 6-well plates were infected (or an uninfected control)  
379 with *R. parkeri* as described above and were incubated for 4 d at a 33°C 5% CO<sub>2</sub>. On  
380 the day of harvest, cells in each well were washed with 4 ml of 1 x phosphate buffered  
381 saline (PBS). 1 ml of fresh 1 x PBS was added to each well and used to scrape the  
382 cells, centrifuged at 1000 x g for 5 min on a microfuge and the supernatant was  
383 aspirated from the cell pellet. Cell pellets were extracted in 2:1:1  
384 chloroform:methanol:PBS solution with addition of 10 nM dodecylglycerol internal  
385 standard, after which the organic phase was separated, collected, and dried down  
386 under N<sub>2</sub> gas. The dried-down lipidome extract was then resuspended in 150 µl  
387 chloroform and stored at -80°C until analysis. For mass spectrometry analysis, an  
388 aliquot of this sample solution was injected into an Agilent 6430 LC-MS/MS and  
389 metabolites were chromatographically separated and analyzed by SRM-based targeted  
390 LC-MS/MS as previously described (47, 48).

391

### 392 **Immunofluorescence microscopy**

393 To measure bacterial shape, Vero cells were plated at 50% confluency on 96-  
394 well glass bottom plates in DMEM plus 2% FBS and allowed to settle overnight at 37°C,  
395 5% CO<sub>2</sub>. The following day, cells were infected with an MOI = 0.1 of wild-type *R.*

396 *parkeri*, centrifuged at 300 x *g* for 5 min and incubated for 2 h at 33°C, 5% CO<sub>2</sub>. Media  
397 containing bacteria was aspirated and replaced with media with or without the  
398 appropriate concentration of drug (see above), and cells were further incubated for 72 h  
399 at 33°C, 5% CO<sub>2</sub>. Cells were fixed with 4% paraformaldehyde in 1 x PBS for 20 min at  
400 room temperature, washed with 1 x PBS, and permeabilized with 0.05% Triton X-100 in  
401 1 x PBS for 5 min. Cells were then stained for immunofluorescence with mouse anti-  
402 *Rickettsia* primary antibody 14-13 and goat anti-mouse Alexa-488 secondary antibody  
403 to stain bacteria, and Hoechst 33342 to stain DNA. Infected cells were imaged on a  
404 Nikon Ti Eclipse microscope with a Yokogawa CSU-XI spinning disc confocal, 100X  
405 (1.4 NA) Plan Apo objective, a Clara Interline CCD Camera and MetaMorph software  
406 taking 0.15 µm z-slices across 5 µm in the z-plane. Maximum Z-projections for each  
407 channel were made using ImageJ and a custom pipeline was created in CellProfiler  
408 software (29) to identify individual bacteria in each image. The CellProfiler module  
409 MeasureObjectSizeShape was used to calculate size and shape parameters of each  
410 bacterium.

411

#### 412 ***R. parkeri* qPCR growth and drug dose response curves**

413 Confluent Vero cells grown in 96-well tissue culture plates were infected with an MOI =  
414 0.1 of *R. parkeri* and incubated in DMEM plus 2% FBS with or without the appropriate  
415 concentration of drug (see above) for 72 h at 33°C, 5% CO<sub>2</sub>. To harvest cells at the  
416 appropriate time point, media was aspirated and cells lifted with 50 µl of 0.25% trypsin-  
417 EDTA followed by incubation at 37°C for 5 min. Lifted cells were resuspended with an  
418 additional 50 µl of DMEM before adding to 50 µl Nuclei Lysis Buffer (Wizard Genomic

419 DNA Purification kit; Promega) and frozen at -20°C overnight. Cells were then thawed  
420 and boiled for 10 min to release genomic DNA. To remove RNA, 20 µg/mL RNase A  
421 was added to each sample, incubated for 15 min at 37°C, and then samples were  
422 cooled to room temperature. Protein was removed by adding 50 µl of protein  
423 precipitation solution, mixing by pipetting, then centrifuging in a microfuge for 15 min at  
424 1500 x *g* at 4°C. DNA was precipitated by adding 100 µl of the resulting supernatant to  
425 100 µl of isopropanol, mixing by pipetting, and centrifuging for 15 min at 1500 x *g* at  
426 4°C. Isopropanol was removed and the DNA pellet was washed with 70% ethanol and  
427 centrifuged for 15 min at 1500 x *g*. Resulting DNA pellets were dried, then resuspended  
428 in 50 µl of H<sub>2</sub>O and allowed to rehydrate overnight at 4°C. For quantitative real-time  
429 PCR, 5 µl genomic DNA was used with primers to the *R. parkeri* gene encoding the  
430 17kDa antigen (49) on a Bio-Rad CFX96 Touch Real-Time PCR Detection System.  
431 *Rickettsia* genome copy number was quantified against a standard curve of a plasmid  
432 containing a single copy of the *R. parkeri* 17kDa gene. Regression analysis and EC50  
433 calculations were performed using GraphPad Prism 7 software.

434

### 435 **Statistical analyses**

436 Statistical analysis was performed in GraphPad PRISM 7 and statistical parameters and  
437 significance are reported in the Figures and Figure Legends. Statistical significance was  
438 determined either by an unpaired Student's t-test or a one-way ANOVA where  
439 indicated. Statistical significance was denoted by asterisks as follows: \*,  $p < 0.05$ ; \*\*,  $p <$   
440  $0.01$ ; \*\*\*,  $p < 0.001$ ; \*\*\*\*,  $p < 0.0001$ , compared to controls.

441

442 **Acknowledgments**

443 We are grateful to Rebecca Lamason for critical reading of the manuscript. We thank  
444 Eric Lee and Dan Portnoy for reagents. We thank Matthew Knight, Eric Lee, Ellen Yeh,  
445 David Booth, Thibaut Brunet, and members of the Welch lab for helpful technical advice  
446 and discussions. This work was performed in part at the CRL MIC, which is supported  
447 by NIH grant S10RR027696-01. V.A. was supported by the NIH/NIAID grant F32  
448 AI133912A. M.D.W. was supported by NIH/NIAID grants R01 AI109044 and R21  
449 AI109270. C.A.B. and D.K.N. were supported by NIH/NCI grant R01 CA172667.  
450

## 451 References

- 452 1. Yu X-J, Walker DH. 2006. The Order Rickettsiales, p 493-528. *In* The  
453 Prokaryotes. Springer New York, New York, NY.
- 454 2. Kirkland KB, Wilkinson WE, Sexton DJ. 1995. Therapeutic delay and mortality in  
455 cases of Rocky Mountain spotted fever. *Clin Infect Dis* 20:1118–1121.
- 456 3. Paddock CD, Sumner JW, Comer JA, Zaki SR, Goldsmith CS, Goddard J,  
457 McLellan SLF, Tamminga CL, Ohl CA. 2004. *Rickettsia parkeri*: a newly  
458 recognized cause of spotted fever rickettsiosis in the United States. *Clin Infect Dis*  
459 38:805–811.
- 460 4. Paddock CD, Finley RW, Wright CS, Robinson HN, Schrodtt BJ, Lane CC, Ekenna  
461 O, Blass MA, Tamminga CL, Ohl CA, McLellan SLF, Goddard J, Holman RC,  
462 Openshaw JJ, Sumner JW, Zaki SR, Ereemeeva ME. 2008. *Rickettsia parkeri*  
463 rickettsiosis and its clinical distinction from Rocky Mountain spotted fever. *Clin*  
464 *Infect Dis* 47:1188–1196.
- 465 5. Andersson JO, Andersson SG. 1999. Insights into the evolutionary process of  
466 genome degradation. *Curr Opin Genet Dev* 9:664–671.
- 467 6. Moran NA. 2002. Microbial minimalism: genome reduction in bacterial pathogens.  
468 *Cell* 108:583–586.
- 469 7. Darby AC, Cho N-H, Fuxelius H-H, Westberg J, Andersson SGE. 2007.  
470 Intracellular pathogens go extreme: genome evolution in the Rickettsiales. *Trends*  
471 *Genet* 23:511–520.
- 472 8. Blanc G, Ogata H, Robert C, Audic S, Suhre K, Vestris G, Claverie J-M, Raoult D.  
473 2007. Reductive genome evolution from the mother of *Rickettsia*. *PLoS Genet*  
474 3:e14.
- 475 9. Gillespie JJ, Williams K, Shukla M, Snyder EE, Nordberg EK, Ceraul SM,  
476 Dharmanolla C, Rainey D, Soneja J, Shallom JM, Vishnubhat ND, Wattam R,  
477 Purkayastha A, Czar M, Crasta O, Setubal JC, Azad AF, Sobral BS. 2008.  
478 *Rickettsia* phylogenomics: unwinding the intricacies of obligate intracellular life.  
479 *PLoS ONE* 3:e2018.
- 480 10. Heuston S, Begley M, Gahan CGM, Hill C. 2012. Isoprenoid biosynthesis in  
481 bacterial pathogens. *Microbiology* 158:1389–1401.
- 482 11. Goldstein JL, Brown MS. 1990. Regulation of the mevalonate pathway. *Nature*  
483 343:425–430.
- 484 12. Eberl M, Hintz M, Jamba Z, Beck E, Jomaa H, Christiansen G. 2004. *Mycoplasma*  
485 *penetrans* is capable of activating V gamma 9/V delta 2 T cells while other human  
486 pathogenic mycoplasmas fail to do so. *Infect Immun* 72:4881–4883.

- 487 13. Clastre M, Goubard A, Prel A, Mincheva Z, Viaud-Massuart M-C, Bout D, Rideau  
488 M, Velge-Roussel F, Laurent F. 2007. The methylerythritol phosphate pathway for  
489 isoprenoid biosynthesis in coccidia: presence and sensitivity to fosmidomycin.  
490 *Exp Parasitol* 116:375–384.
- 491 14. Driscoll TP, Verhoeve VI, Guillotte ML, Lehman SS, Rennoll SA, Beier-Sexton M,  
492 Rahman MS, Azad AF, Gillespie JJ. 2017. Wholly *Rickettsia*! Reconstructed  
493 metabolic profile of the quintessential bacterial parasite of eukaryotic cells. *MBio*  
494 8:84.
- 495 15. Berthelot K, Estevez Y, Deffieux A, Peruch F. 2012. Isopentenyl diphosphate  
496 isomerase: A checkpoint to isoprenoid biosynthesis. *Biochimie* 94:1621–1634.
- 497 16. Murphy DJ. 2001. The biogenesis and functions of lipid bodies in animals, plants  
498 and microorganisms. *Prog Lipid Res* 40:325–438.
- 499 17. Manat G, Roure S, Auger R, Bouhss A, Barreteau H, Mengin-Lecreulx D, Touzé  
500 T. 2014. Deciphering the metabolism of undecaprenyl-phosphate: the bacterial  
501 cell-wall unit carrier at the membrane frontier. *Microb Drug Resist* 20:199–214.
- 502 18. Nowicka B, Kruk J. 2010. Occurrence, biosynthesis and function of isoprenoid  
503 quinones. *Biochim Biophys Acta* 1797:1587–1605.
- 504 19. Aussel L, Pierrel F, Loiseau L, Lombard M, Fontecave M, Barras F. 2014.  
505 Biosynthesis and physiology of coenzyme Q in bacteria. *Biochim Biophys Acta*  
506 1837:1004–1011.
- 507 20. Botelho-Nevers E, Rolain JM, Espinosa L, Raoult D. 2008. Statins limit *Rickettsia*  
508 *conorii* infection in cells. *Int J Antimicrob Agents* 32:344–348.
- 509 21. Reed SCO, Serio AW, Welch MD. 2012. *Rickettsia parkeri* invasion of diverse  
510 host cells involves an Arp2/3 complex, WAVE complex and Rho-family GTPase-  
511 dependent pathway. *Cell Microbiol* 14:529–545.
- 512 22. Rolain JM, Maurin M, Vestris G, Raoult D. 1998. In vitro susceptibilities of 27  
513 rickettsiae to 13 antimicrobials. *Antimicrob Agents Chemother* 42:1537–1541.
- 514 23. Pang H, Winkler HH. 1994. Analysis of the peptidoglycan of *Rickettsia prowazekii*.  
515 *J Bacteriol* 176:923–926.
- 516 24. Baisa G, Stabo NJ, Welch RA. 2013. Characterization of *Escherichia coli* D-  
517 cycloserine transport and resistant mutants. *J Bacteriol* 195:1389–1399.
- 518 25. Desjardins CA, Cohen KA, Munsamy V, Abeel T, Maharaj K, Walker BJ, Shea TP,  
519 Almeida DV, Manson AL, Salazar A, Padayatchi N, O'Donnell MR, Mlisana KP,  
520 Wortman J, Birren BW, Grosset J, Earl AM, Pym AS. 2016. Genomic and  
521 functional analyses of *Mycobacterium tuberculosis* strains implicate *ald* in D-  
522 cycloserine resistance. *Nat Genet* 48:544–551.

- 523 26. Delcour AH. 2009. Outer membrane permeability and antibiotic resistance.  
524 Biochim Biophys Acta 1794:808–816.
- 525 27. Wisseman CL, Silverman DJ, Waddell A, Brown DT. 1982. Penicillin-induced  
526 unstable intracellular formation of spheroplasts by rickettsiae. J Infect Dis  
527 146:147–158.
- 528 28. Allan EJ, Hoischen C, Gumpert J. 2009. Bacterial L-forms. Adv Appl Microbiol  
529 68:1–39.
- 530 29. Carpenter AE, Jones TR, Lamprecht MR, Clarke C, Kang IH, Friman O, Guertin  
531 DA, Chang JH, Lindquist RA, Moffat J, Golland P, Sabatini DM. 2006. CellProfiler:  
532 image analysis software for identifying and quantifying cell phenotypes. Genome  
533 Biol 7:R100.
- 534 30. Wolf YI, Koonin EV. 2013. Genome reduction as the dominant mode of evolution.  
535 Bioessays 35:829–837.
- 536 31. Bick JA, Lange BM. 2003. Metabolic cross talk between cytosolic and plastidial  
537 pathways of isoprenoid biosynthesis: unidirectional transport of intermediates  
538 across the chloroplast envelope membrane. Arch Biochem Biophys 415:146–154.
- 539 32. Flügge U-I, Gao W. 2005. Transport of isoprenoid intermediates across  
540 chloroplast envelope membranes. Plant Biol 7:91–97.
- 541 33. Yeh E, DeRisi JL. 2011. Chemical rescue of malaria parasites lacking an  
542 apicoplast defines organelle function in blood-stage *Plasmodium falciparum*.  
543 PLoS Biol 9:e1001138.
- 544 34. Carabeo RA, Mead DJ, Hackstadt T. 2003. Golgi-dependent transport of  
545 cholesterol to the *Chlamydia trachomatis* inclusion. Proc Natl Acad Sci U S A  
546 100:6771–6776.
- 547 35. Samanta D, Mulye M, Clemente TM, Justis AV, Gilk SD. 2017. Manipulation of  
548 host cholesterol by obligate intracellular bacteria. Front Cell Infect Microbiol 7:165.
- 549 36. Wilburn KM, Fieweger RA, VanderVen BC. 2018. Cholesterol and fatty acids  
550 grease the wheels of *Mycobacterium tuberculosis* pathogenesis. Pathog Dis 76.
- 551 37. Ramm LE, Winkler HH. 1976. Identification of cholesterol in the receptor site for  
552 rickettsiae on sheep erythrocyte membranes. Infect Immun 13:120–126.
- 553 38. Martinez JJ, Seveau S, Veiga E, Matsuyama S, Cossart P. 2005. Ku70, a  
554 component of DNA-dependent protein kinase, is a mammalian receptor for  
555 *Rickettsia conorii*. Cell 123:1013–1023.
- 556 39. Bellosta S, Corsini A. 2018. Statin drug interactions and related adverse  
557 reactions: an update. Expert Opin Drug Saf 17:25–37.



- 558 40. Strickman D, Sheer T, Salata K, Hershey J, Dasch G, Kelly D, Kuschner R. 1995.  
559 In vitro effectiveness of azithromycin against doxycycline-resistant and -  
560 susceptible strains of *Rickettsia tsutsugamushi*, etiologic agent of scrub typhus.  
561 Antimicrob Agents Chemother 39:2406–2410.
- 562 41. Kelly DJ, Fuerst PA, Richards AL. 2017. The historical case for and the future  
563 study of antibiotic-resistant scrub typhus. Trop Med Infect Dis 2:63.
- 564 42. Cross R, Ling C, Day NPJ, McGready R, Paris DH. 2016. Revisiting doxycycline  
565 in pregnancy and early childhood--time to rebuild its reputation? Expert Opin Drug  
566 Saf, 29 ed. 15:367–382.
- 567 43. Bessoff K, Sateriale A, Lee KK, Huston CD. 2013. Drug repurposing screen  
568 reveals FDA-approved inhibitors of human HMG-CoA reductase and isoprenoid  
569 synthesis that block *Cryptosporidium parvum* growth. Antimicrob Agents  
570 Chemother 57:1804–1814.
- 571 44. Anacker RL, Mann RE, Gonzales C. 1987. Reactivity of monoclonal antibodies to  
572 *Rickettsia rickettsii* with spotted fever and typhus group rickettsiae. J Clin  
573 Microbiol 25:167–171.
- 574 45. Lamason RL, Bastounis E, Kafai NM, Serrano R, Del Álamo JC, Theriot JA,  
575 Welch MD. 2016. *Rickettsia Sca4* reduces vinculin-mediated intercellular tension  
576 to promote spread. Cell 167:670–683.e10.
- 577 46. Darling AE, Mau B, Perna NT. 2010. progressiveMauve: multiple genome  
578 alignment with gene gain, loss and rearrangement. PLoS ONE 5:e11147.
- 579 47. Benjamin DI, Cozzo A, Ji X, Roberts LS, Louie SM, Mulvihill MM, Luo K, Nomura  
580 DK. 2013. Ether lipid generating enzyme AGPS alters the balance of structural  
581 and signaling lipids to fuel cancer pathogenicity. Proc Natl Acad Sci USA  
582 110:14912–14917.
- 583 48. Louie SM, Grossman EA, Crawford LA, Ding L, Camarda R, Huffman TR,  
584 Miyamoto DK, Goga A, Weerapana E, Nomura DK. 2016. GSTP1 is a driver of  
585 triple-negative breast cancer cell metabolism and pathogenicity. Cell Chem Biol  
586 23:567–578.
- 587 49. Grasperge BJ, Reif KE, Morgan TD, Sunyakumthorn P, Bynog J, Paddock CD,  
588 Macaluso KR. 2012. Susceptibility of inbred mice to *Rickettsia parkeri*. Infect  
589 Immun 80:1846–1852.

590 **Figure Legends**

591 **Figure 1: Generalized MEV and MEP pathways leading to downstream isoprenoid**

592 **products.** The green arrows indicate the presence of annotated enzymes encoded in  
593 the *R. parkeri* genome. The gray arrows indicate the absence of annotated enzymes  
594 encoded in the *R. parkeri* genome. The orange arrow indicates the presence of the IDI  
595 enzyme from the host genome. The light yellow background denotes the upstream  
596 isoprenoid pathway whereas the light blue denotes the downstream isoprenoid  
597 pathway. The central black arrow and white question mark denote a possible  
598 transporter for isoprenoids from the host into the bacteria. Double hash arrows indicate  
599 multiple enzymatic steps. Statin drugs inhibit the activity of HMG-CoA reductase and the  
600 formation of mevalonate of the MEV pathway. Fosmidomycin is an inhibitor of DXP  
601 reductoisomerase of the MEP pathway. Alendronate sodium hydrate is an inhibitor of  
602 farnesyl diphosphate synthase. D-cycloserine (DCS) is an inhibitor of D-alanine  
603 racemase and D-alanine-D-alanine ligase.

604

605 **Figure 2: Genome evolution in the *Rickettsiales* isoprenoid pathway. A.**

606 Phylogenetic neighbor-joining tree of the *Rickettsiales* and the outgroup *Pelagibacter*  
607 *ubique*. Scale bar length represents 0.01 nucleotide substitutions per site. The presence  
608 of intact upstream MEP pathway genes or *idi* gene for each species is indicated by a  
609 green-filled box. The environmental niche is indicated in the adjoining column, as  
610 follows: C, intracellular cytoplasmic; V, intracellular vacuolar; F, free living. **B.** A  
611 schematic of the *R. parkeri* *idi* genome locus. Genes involved in conjugal transfer are  
612 colored in blue. Genes that are pseudogenized are in yellow. The *Idi* gene is highlighted

613 in purple. **C.** Whole genome alignment of *R. parkeri* and *R. rickettsii*. The *R. rickettsii*  
614 genome has a large 33.5kb deletion (in orange) in the genome alignment for the region  
615 adjacent to the *idi*. The gray line segments indicate inverted alignment orientation  
616 between *R. parkeri* and *R. rickettsii*.

617

618 **Figure 3: Targeted mass spectrometry of bacterial and host isoprenoids.** Graph of  
619 the relative levels of host and bacterial isoprenoids in 4 d.p.i. uninfected and infected  
620 Vero cell cultures, normalized to internal standards. Four replicates were done for each  
621 experiment. Error bars represent standard deviation. Statistical comparisons were done  
622 by the unpaired Student's t-test; ns, not significant; \*,  $p < 0.05$ ; \*\*,  $p < 0.01$ ; \*\*\*,  $p < 0.001$ .

623

624 **Figure 4: Chemical inhibition and rescue of *R. parkeri* growth. A.** Graph of *R.*  
625 *parkeri* genome copy numbers in the presence of varying concentrations of pitavastatin,  
626 without or with mevalonate. Four replicates were done, and error bars represent  
627 standard deviation. Statistical comparisons were done by the unpaired Student's t-test  
628 for each concentration of pitavastatin for the wild type vs wild type with mevalonate  
629 supplementation; ns, not significant; \*,  $p < 0.05$ ; \*\*,  $p < 0.01$ ; \*\*\*,  $p < 0.001$ ; \*\*\*\*,  $p < 0.0001$ .

630 **B.** Dose-dependent growth inhibition of *R. parkeri* in the presence of the indicated drugs  
631 targeting MEV or MEP pathway enzymes, or tetracycline, normalized to a no-drug  
632 control. Fosmidomycin and alendronate failed to generate fit curves. Measurements for  
633 each drug concentration were performed in duplicate and error bars represent standard  
634 deviation.

635

636 **Figure 5: Shape and size measurements of *R. parkeri* bacteria under different**  
637 **drug pressures. A.** Representative bacterial cells from the EC curve drug  
638 concentrations from Figure 5B. Scale bar = 1  $\mu\text{m}$ . **B.** Dose-dependent changes in area  
639 and eccentricity of *R. parkeri* bacterial cells under drug treatment with lovastatin,  
640 pitavastatin, tetracycline, or D-cycloserine. Each measurement is the mean of at least  
641 40 individual bacterial cells, except for concentrations of D-cycloserine  $>250 \mu\text{M}$  where  
642 most bacterial cells were lysed and fewer measurements were possible (for 500  $\mu\text{M}$   
643 DCS, n=22; for 1000  $\mu\text{M}$  DCS, n=18; for 2000  $\mu\text{M}$  DCS, n=13). Error bars represent the  
644 95% confidence interval. **C.** Graphs plotting area and eccentricity measurements at the  
645  $\text{EC}_{100}$  values calculated from Figure 4B and matched to measurements from Figure 5A.  
646 Regions shaded in yellow are the calculated  $\text{EC}_{50}$ - $\text{EC}_{100}$  values from Figure 4B. Graphs  
647 show the mean of the sample set and error bars represent the 95% confidence interval.  
648 Statistical comparisons were done by one-way ANOVA of all drug treated samples  
649 compared to the no drug (nd) sample set; ns, not significant; \*,  $p<0.05$ ; \*\*,  $p<0.01$ ; \*\*\*,  
650  $p<0.001$ ; \*\*\*,  $p<0.0001$ .

Figure 1

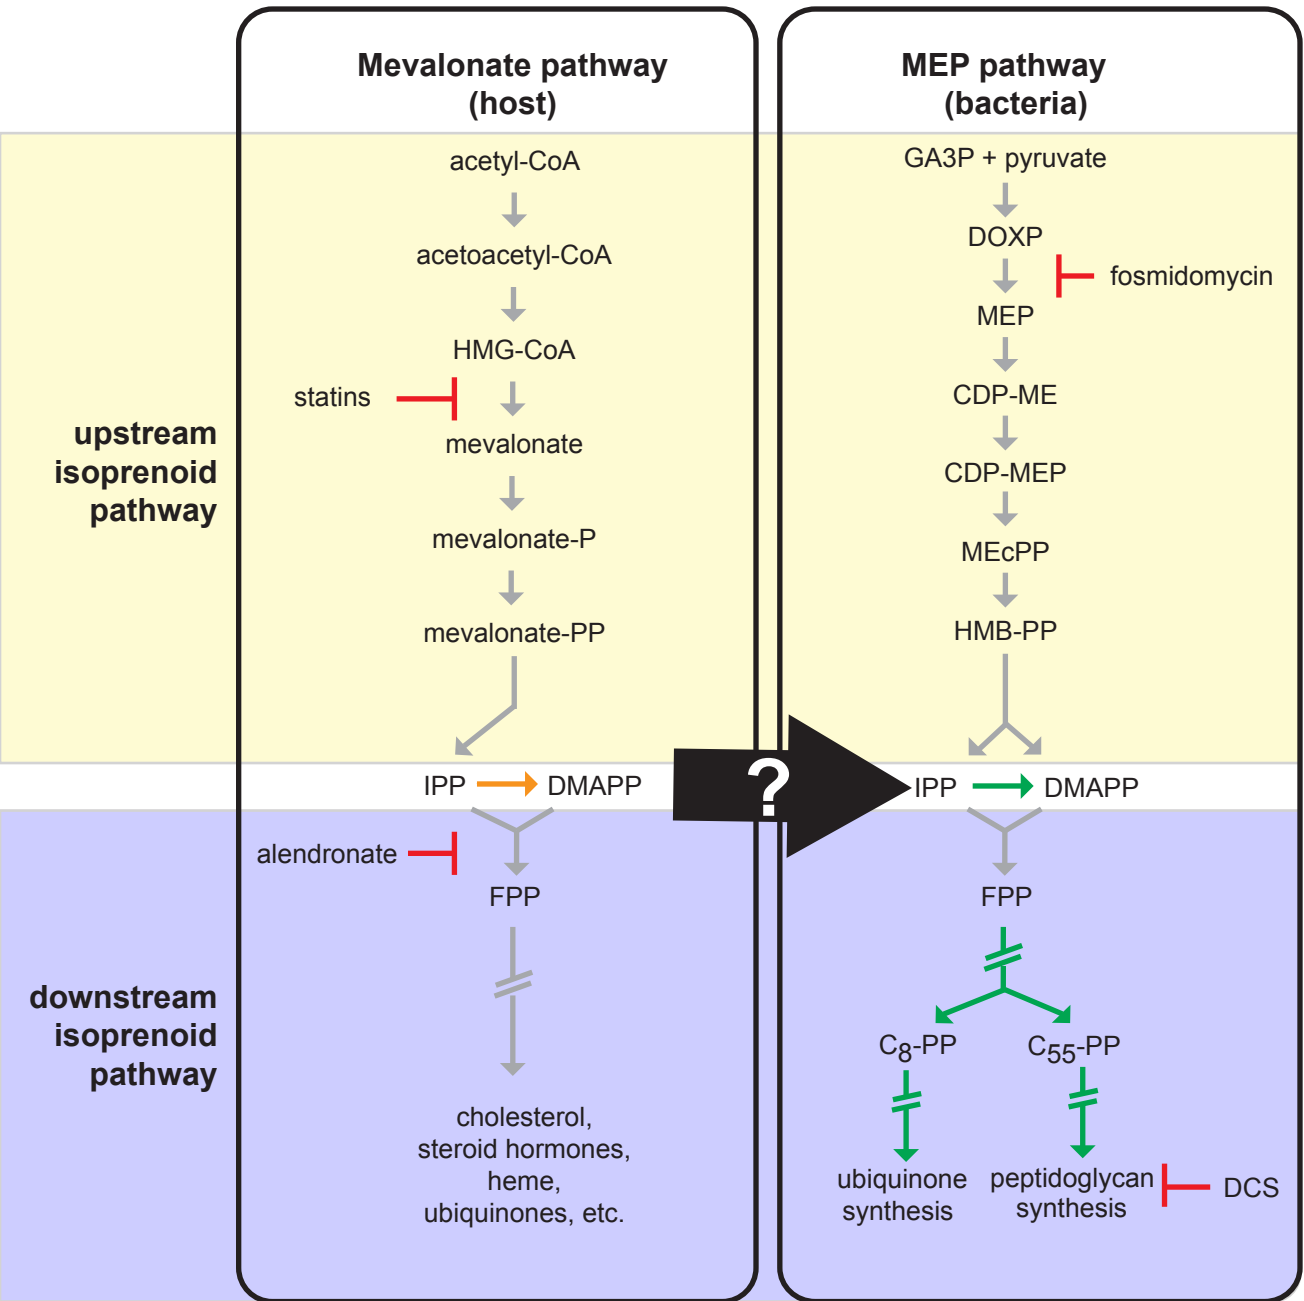

- ↓ enzyme(s) present in *Rickettsia parkeri* genome
- ↓ enzyme(s) absent in *Rickettsia parkeri* genome
- ↓ IDI enzyme present in host genome

**Figure 2**

**A.**

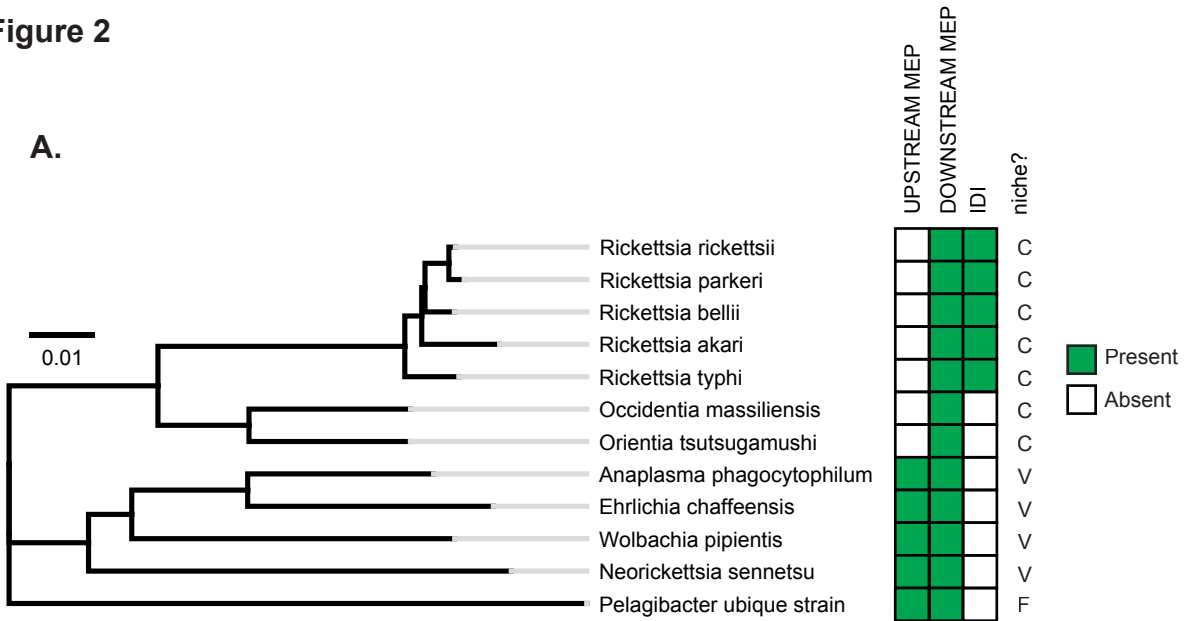

**B.**

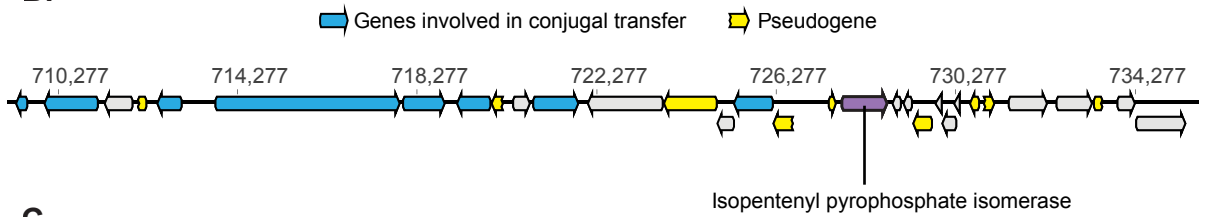

**C.**

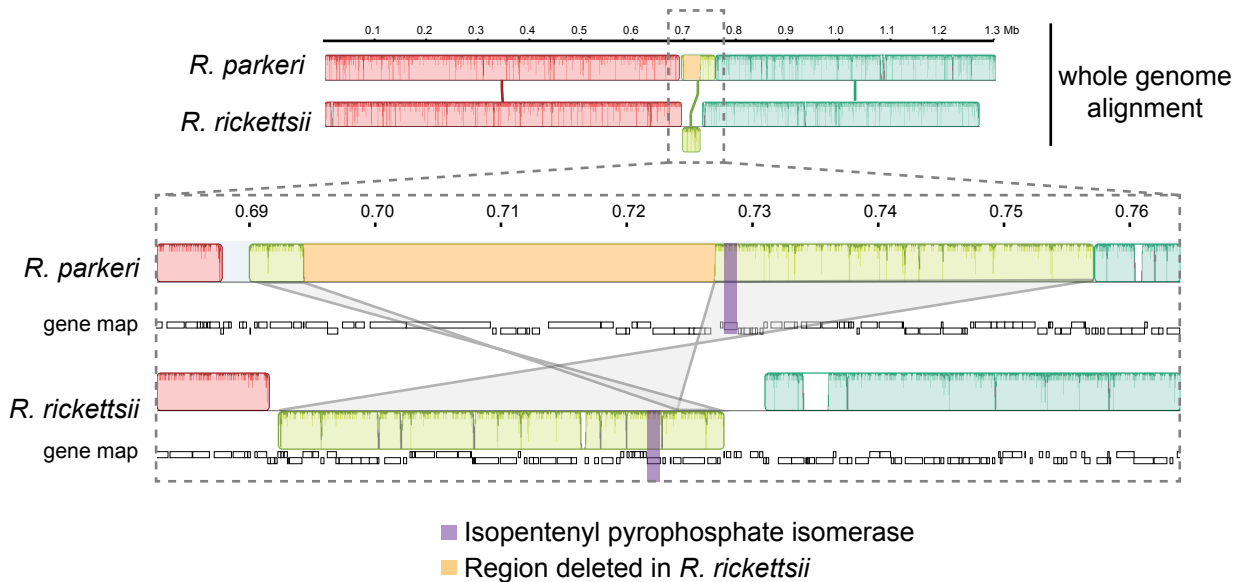

Figure 3

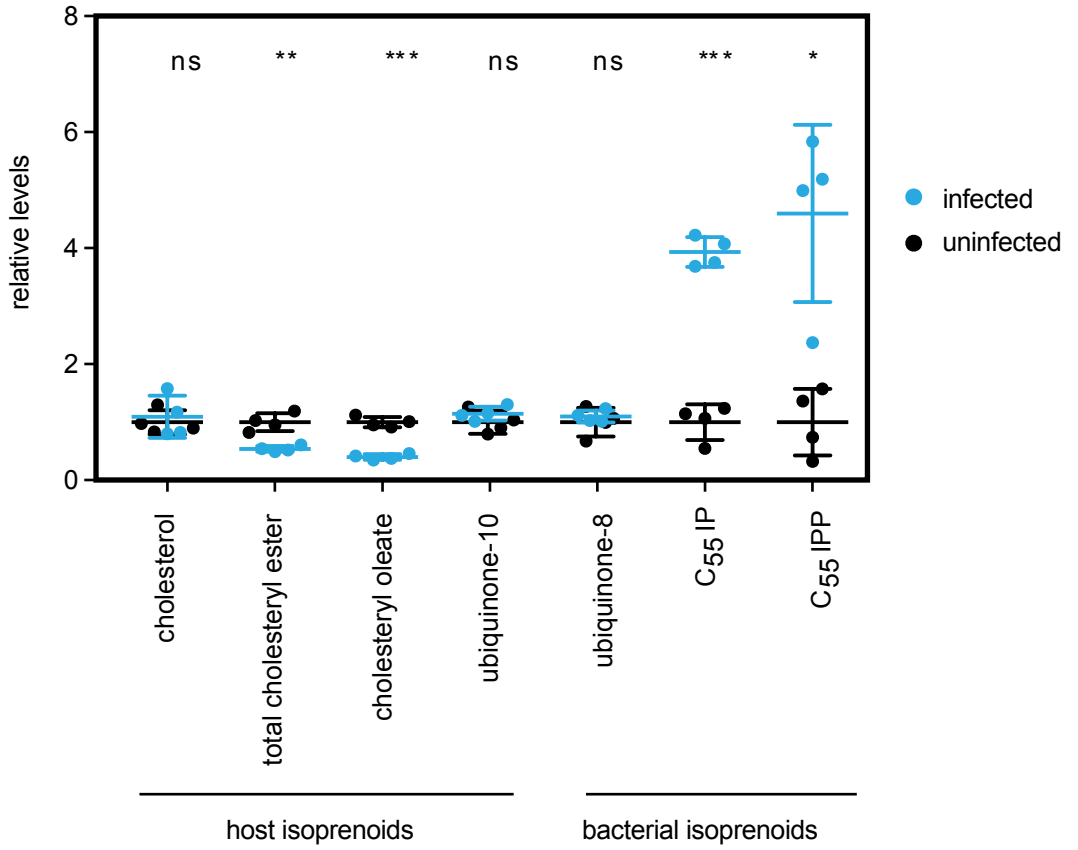

Figure 4

A.

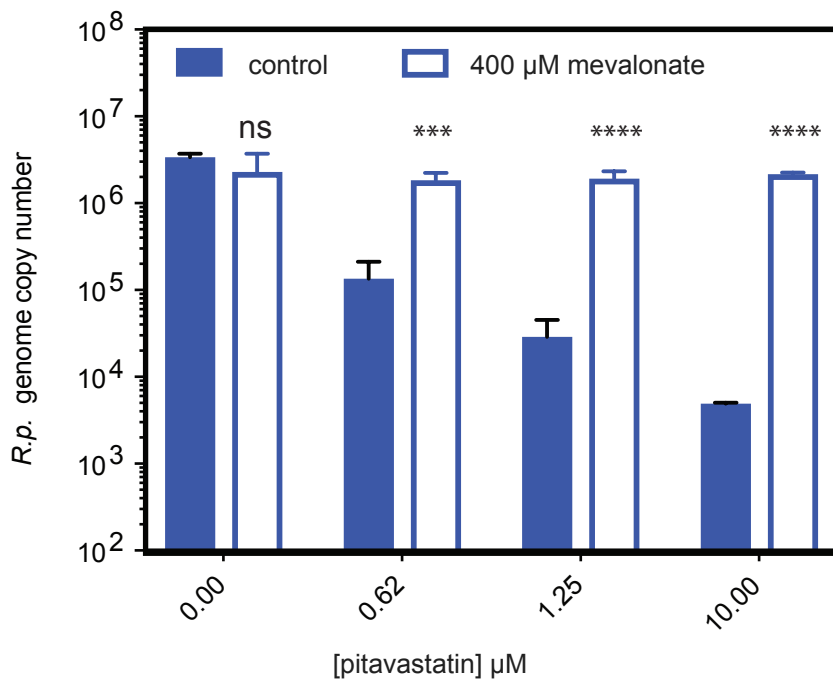

B.

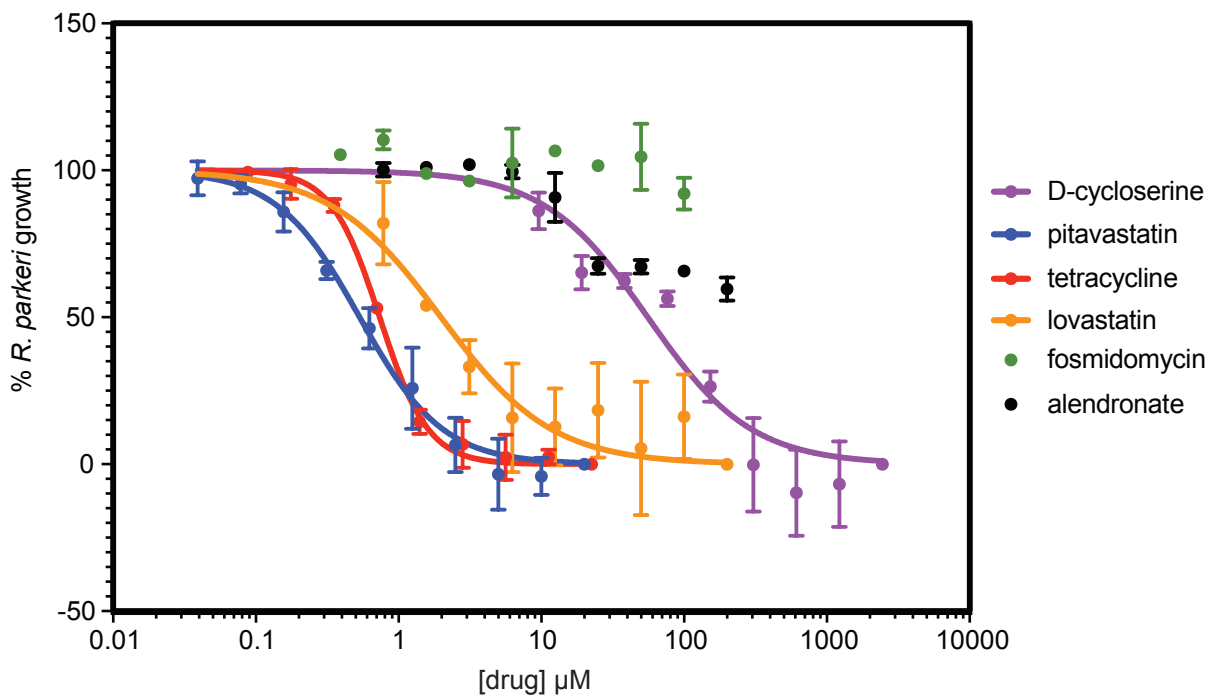



**Figure 5**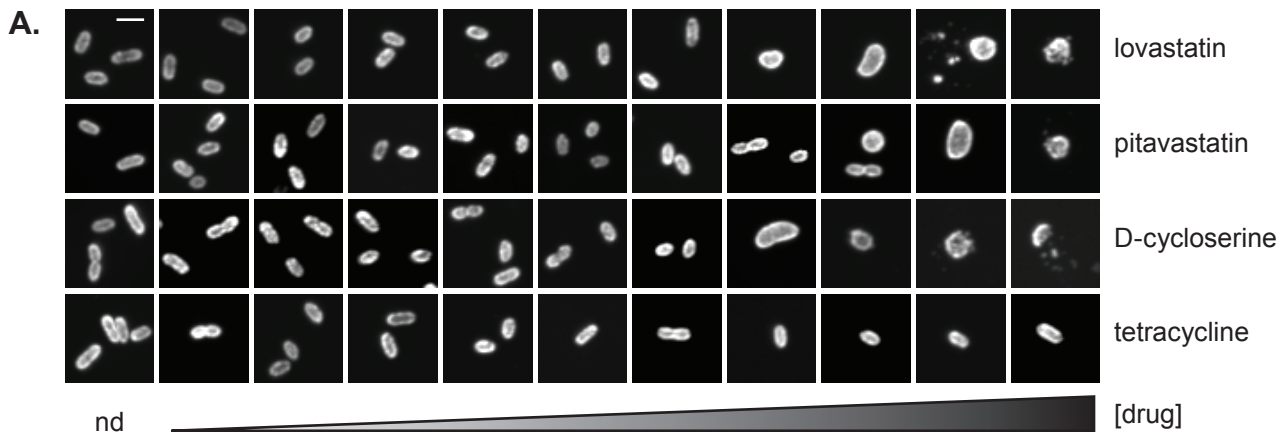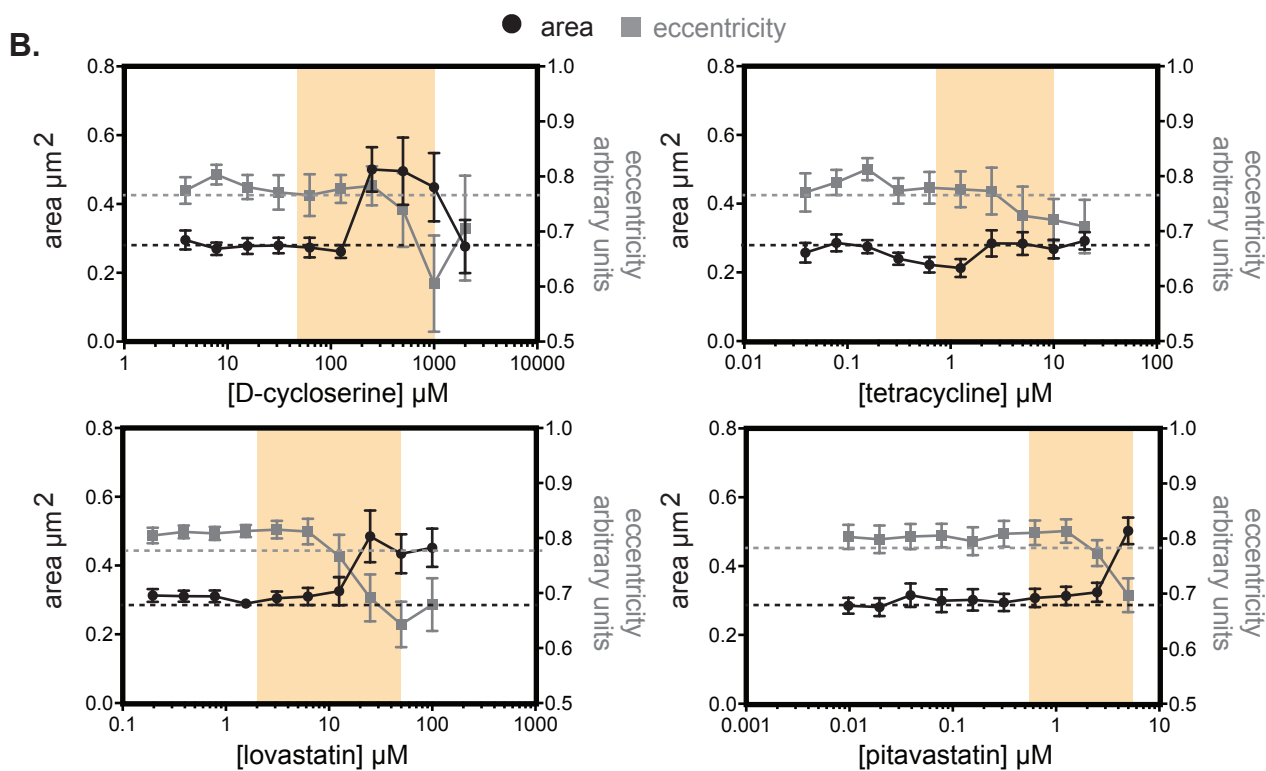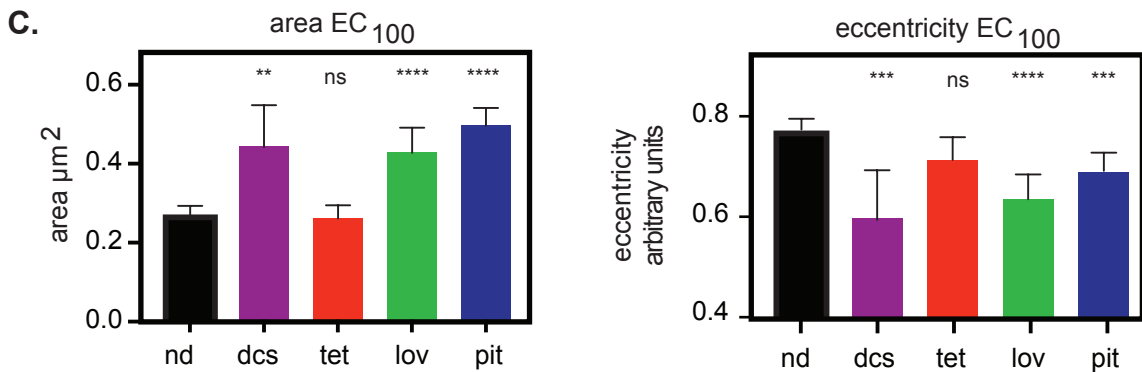

Source: https://biorxiv.org/content/biorxiv/early/2019/01/23/528018.full-text.pdf
